# Supplementary material for: RB1CC1 Protein Positively Regulates Transforming Growth Factor-β Signaling through the Modulation of Arkadia E3 Ubiquitin Ligase Activity
Source: PubMed Central journal article supplement — J Biol Chem. 2011 Jul 27;286(37):32502–12. doi: 10.1074/jbc.M111.227561 (PMC3173165; doi:10.1074/jbc.m111.227561), 2011-07-27

## **Supplemental Experimental Procedures**

### **Primer sequences used for quantitative realtime PCR**

The primer sequences used were as follows:

human hypoxanthine phosphoribosyltransferase 1 (HPRT1):

forward, 5'-TTTGCTTTCCTTGGTCAGGC-3',

reverse, 5'-GCTTGCGACCTTGACCATCT-3'

human RB1CC1:

forward, 5'-AGTGCCTAACCAGACATAG-3'

reverse, 5'-GAGAGAGCACCAGTTCAG-3'

## **Supplemental Figure legend**

### **Supplemental Figure S1. Expression of RB1CC1 mRNA in various human cell lines**

Levels of expression of mRNA for RB1CC1 were examined by qRT-PCR, and values were normalized to the amount of HPRT1 mRNA. Results are shown in arbitrary units. Error bars represent S.D.

Figure S1.

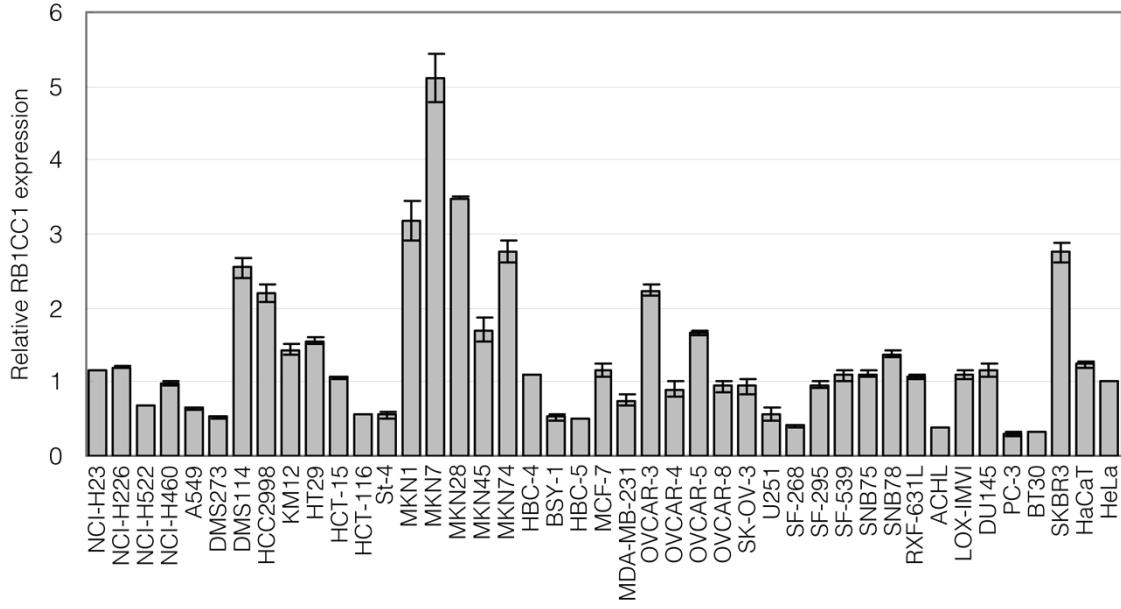

Supplement: supp_M111.227561_jbc.M111.227561-1.pdf [file supp_M111.227561_jbc.M111.227561-1.pdf]
